# Supplementary material for: How do individuals cope with stress? Behavioural, physiological and neuronal differences between proactive and reactive coping styles in fish
Source: Oxford University Press journal article supplement (doi:10.1242/jeb.153213), 2017-01-01
Supplement: jeb153213supp.pdf [file jeb153213supp.pdf]

**Table S1** Primer sequences for target genes

| Gene                      | Primer Sequence 5' → 3'                                         | Accession nr.                      | Reference                                                                                                                                                                                                         |
|---------------------------|-----------------------------------------------------------------|------------------------------------|-------------------------------------------------------------------------------------------------------------------------------------------------------------------------------------------------------------------|
| <i>ef1aα</i>              | Fw CCCCTCCAGGACGTTTACAAA<br>Rev CACACGGCCCACAGGTACA             | BT059133.1                         | Ingerslev et al. (2006). Expression profiling and validation of reference gene candidates in immune relevant tissues and cells from Atlantic salmon ( <i>Salmo salar</i> L.). <i>Molec Immunol</i> 43, 1194-1201. |
| <i>S20</i>                | Fwd GCAGACCTTATCCGTGGAGCTA<br>Rev TGGTGATGCGCAGAGTCTTG          | NM_001140843.1                     | Olsvik et al. (2005). Evaluation of potential reference genes in real-time RT-PCR studies of Atlantic salmon. <i>BMC Molec Biol</i> 6, 21                                                                         |
| <i>hprt1</i>              | Fwd CGTGGCTCTCTGCGTGCTCA<br>Rev TGGAGCGGTCGCTGTTACGG            | BT043501.1                         | Andreassen et al. (2009). Characterization of full-length sequenced cDNA inserts (FLiCs) from Atlantic salmon ( <i>Salmo salar</i> ). <i>BMC Genomics</i> 10, 502.                                                |
| <i>bdnf</i>               | Fwd ATGTCTGGGCAGACCGTTAC<br>Rev GTTGTCTGCATTGGGAGTT             | GU108576.1                         | Vindas et al. (2014). Coping with unpredictability: Dopaminergic and neurotrophic responses to omission of expected reward in Atlantic salmon ( <i>Salmo salar</i> L.). <i>PLoS ONE</i> 9, e85543.                |
| <i>pcna</i>               | Fwd TGAGCTCGTCGGGTATCTCT<br>Rev CTCGAAGACTAGGGCGAGTG            | BT056931.1                         | Vindas et al. (2014). Coping with unpredictability: Dopaminergic and neurotrophic responses to omission of expected reward in Atlantic salmon ( <i>Salmo salar</i> L.). <i>PLoS ONE</i> 9, e85543.                |
| <i>neurod</i>             | Fwd CAATGGACAGCTCCCACATCT<br>Rev CCAGCGCACTTCCGTATGA            | BT058820.1                         | Leong et al. (2010). <i>Salmo salar</i> and <i>Esox lucius</i> full-length cDNA sequences reveal changes in evolutionary pressures on a post-tetraploidization genome. <i>BMC Genomics</i> 11, 279-279.           |
| <i>5-HT<sub>1Aα</sub></i> | Fwd ATGCTGGTCCCTCTACGGGCG<br>Rev CGTGGTTCACCGCGCCGTTT           | AGKD01067361.1<br>: 7182-7844*     | Thörnqvist et al. (2015). Natural selection constrains personality and brain gene expression differences in Atlantic salmon ( <i>Salmo salar</i> ). <i>J Exp Biol</i> 218, 1077-1083.                             |
| <i>5-HT<sub>1Aβ</sub></i> | Fwd TTGATCATGCGTTCAGCCGA<br>Rev AAAGGAATGTAGAACGCGCCGA          | DY694524                           | Thörnqvist et al. (2015). Natural selection constrains personality and brain gene expression differences in Atlantic salmon ( <i>Salmo salar</i> ). <i>J Exp Biol</i> 218, 1077-1083.                             |
| <i>5HTTA</i>              | Fwd ACAAACCACTCCCTCCTCCT<br>Rev CGGCTACATGGCTGAAATGC            | AGKD03016701.1<br>: 3425-5030*     | Thörnqvist, <i>et al.</i> unpublished                                                                                                                                                                             |
| <i>5HTTB</i>              | Fwd TCATGGCCATCTTTGGAGGG<br>Rev TTGTCACAGTTGGTCCAGGG            | AGKD03016179.1<br>: 111470-112049* | Thörnqvist, <i>et al.</i> unpublished                                                                                                                                                                             |
| <i>crf</i>                | Fwd AACCAGCTCGACGACTCGATGG<br>Rev GCTATGGGCTTGTGCTGTAAGT        | BT057824                           | Leong et al. (2010). <i>Salmo salar</i> and <i>Esox lucius</i> full-length cDNA sequences reveal changes in evolutionary pressures on a post-tetraploidization genome. <i>BMC Genomics</i> 11, 279-279.           |
| <i>crfbp</i>              | Fwd TGAGCCAACCAGGTCATCAATGT<br>Rev TCCCTTCATACCCAGCCATCAAA      | BT059529                           | Leong et al. (2010). <i>Salmo salar</i> and <i>Esox lucius</i> full-length cDNA sequences reveal changes in evolutionary pressures on a post-tetraploidization genome. <i>BMC Genomics</i> 11, 279-279.           |
| <i>crf<sub>1</sub></i>    | Fwd TGACCATCTGGGCTGTTGTGATCT<br>Rev TAAGATTGGTGGACAGCAGGAGCA    | -----                              | Nilson et al., unpublished                                                                                                                                                                                        |
| <i>crf<sub>2</sub></i>    | Fwd ACCATGGATGCTACGATTTACCA<br>Rev CTGTCTTGAAATGAATCCATCACACTGC | -----                              | Nilson et al., unpublished                                                                                                                                                                                        |

**Table S2** Mean ( $\pm$  SEM) relative transcript abundance of target genes (to the reference gene *S20*), serotonin (5-HT) and dopamine (DA) neurochemistry, as well as plasma cortisol in reactive and proactive fish at basal and acute stress conditions in dorsolateral pallium (DI), dorsomedial pallium (Dm) and ventral part of the ventral telencephalon (Vv). Two-Way ANOVA statistics for effect of coping style, stress and the interaction between style and stress (if it was maintained in the model which was indicated by "lack of fit" analysis), are given for each variable.

|                                             | Reactive             |                     | Proactive            |                    | Style                                   | ANOVA                                   |                                         |
|---------------------------------------------|----------------------|---------------------|----------------------|--------------------|-----------------------------------------|-----------------------------------------|-----------------------------------------|
|                                             | Control ( $n = 10$ ) | Stress ( $n = 14$ ) | Control ( $n = 12$ ) | Stress ( $n = 8$ ) |                                         | Stress                                  | Interaction                             |
| <b>DI</b>                                   |                      |                     |                      |                    |                                         |                                         |                                         |
| <i>pcna</i>                                 | 0.27 $\pm$ 0.12      | 0.08 $\pm$ 0.02     | 0.07 $\pm$ 0.02      | 0.15 $\pm$ 0.05    | $F_{(3,26)} = 1.71, p = 0.2$            | $F_{(3,26)} = 1.05, p = 0.31$           | $F_{(3,26)} = 8.04, p = \mathbf{0.009}$ |
| <i>bdnf</i>                                 | 0.17 $\pm$ 0.04      | 0.17 $\pm$ 0.02     | 0.17 $\pm$ 0.03      | 0.38 $\pm$ 0.08    | $F_{(3,35)} = 4.02, p = \mathbf{0.05}$  | $F_{(3,35)} = 6.2, p = \mathbf{0.02}$   | $F_{(3,35)} = 4.62, p = \mathbf{0.04}$  |
| <i>neurod</i>                               | 0.06 $\pm$ 0.03      | 0.03 $\pm$ 0.005    | 0.04 $\pm$ 0.008     | 0.05 $\pm$ 0.01    | $F_{(2,24)} = 1.47, p = 0.24$           | $F_{(2,24)} = 0.13, p = 0.72$           | -----                                   |
| <i>5-HT<sub>1A<math>\alpha</math></sub></i> | 0.01 $\pm$ 0.004     | 0.03 $\pm$ 0.01     | 0.02 $\pm$ 0.001     | 0.02 $\pm$ 0.005   | $F_{(2,27)} = 0.02, p = 0.88$           | $F_{(2,27)} = 3.3, p = 0.08$            | -----                                   |
| <i>5-HT<sub>1A<math>\beta</math></sub></i>  | 0.02 $\pm$ 0.004     | 0.01 $\pm$ 0.001    | 0.02 $\pm$ 0.008     | 0.01 $\pm$ 0.006   | $F_{(2,13)} = 0.02, p = 0.89$           | $F_{(2,13)} = 1.56, p = 0.23$           | -----                                   |
| <i>5-HTT<sub>A</sub></i>                    | -----                | 0.006 $\pm$ 0.001   | 0.005 $\pm$ 0.001    | 0.004 $\pm$ 0.001  | -----                                   | -----                                   | -----                                   |
| <i>5-HTT<sub>B</sub></i>                    | -----                | -----               | -----                | -----              | -----                                   | -----                                   | -----                                   |
| <i>crf</i>                                  | 0.04 $\pm$ 0.02      | 0.02 $\pm$ 0.003    | 0.02 $\pm$ 0.004     | 0.02 $\pm$ 0.003   | $F_{(2,31)} = 1.47, p = 0.24$           | $F_{(2,31)} = 1.79, p = 0.19$           | -----                                   |
| <i>crfbp</i>                                | 0.04 $\pm$ 0.01      | 0.03 $\pm$ 0.005    | 0.03 $\pm$ 0.007     | 0.04 $\pm$ 0.01    | $F_{(2,29)} = 0.12, p = 0.73$           | $F_{(2,29)} = 0.35, p = 0.55$           | -----                                   |
| <i>crf<sub>1</sub></i>                      | 0.005 $\pm$ 0.001    | 0.006 $\pm$ 0.001   | 0.005 $\pm$ 0.001    | 0.009 $\pm$ 0.001  | $F_{(2,26)} = 6.55, p = \mathbf{0.02}$  | $F_{(2,26)} = 4.25, p = 0.05$           | -----                                   |
| <i>crf<sub>2</sub></i>                      | -----                | 0.009 $\pm$ 0.002   | 0.02 $\pm$ 0.006     | 0.01 $\pm$ 0.002   | -----                                   | -----                                   | -----                                   |
| <i>5-HT</i>                                 | 125 $\pm$ 11         | 131 $\pm$ 11        | 125 $\pm$ 11         | 105 $\pm$ 6        | $F_{(2,40)} = 1.41, p = 0.24$           | $F_{(2,40)} = 0.31, p = 0.58$           | -----                                   |
| <i>5-HIAA</i>                               | 26 $\pm$ 4           | 42 $\pm$ 4          | 22 $\pm$ 2           | 31 $\pm$ 3         | $F_{(2,40)} = 4.16, p = 0.05$           | $F_{(2,40)} = 14.9, p < \mathbf{0.001}$ | -----                                   |
| <i>DA</i>                                   | 92 $\pm$ 11          | 82 $\pm$ 12         | 72 $\pm$ 12          | 48 $\pm$ 10        | $F_{(2,39)} = 5.98, p = \mathbf{0.02}$  | $F_{(2,39)} = 2.89, p = 0.1$            | -----                                   |
| <i>DOPAC</i>                                | 10 $\pm$ 1           | 9 $\pm$ 2           | 6 $\pm$ 2            | 5 $\pm$ 1          | $F_{(2,39)} = 8.13, p = \mathbf{0.007}$ | $F_{(2,39)} = 0.27, p = 0.6$            | -----                                   |
| <b>Dm</b>                                   |                      |                     |                      |                    |                                         |                                         |                                         |
| <i>pcna</i>                                 | 0.09 $\pm$ 0.02      | 0.08 $\pm$ 0.01     | 0.08 $\pm$ 0.01      | 0.07 $\pm$ 0.01    | $F_{(2,34)} = 0.12, p = 0.73$           | $F_{(2,34)} = 0.41, p = 0.53$           | -----                                   |
| <i>bdnf</i>                                 | 0.14 $\pm$ 0.03      | 0.1 $\pm$ 0.02      | 0.14 $\pm$ 0.03      | 0.14 $\pm$ 0.02    | $F_{(2,33)} = 0.5, p = 0.48$            | $F_{(2,33)} = 0.99, p = 0.33$           | -----                                   |
| <i>neurod</i>                               | 0.03 $\pm$ 0.01      | 0.02 $\pm$ 0.002    | 0.01 $\pm$ 0.002     | 0.02 $\pm$ 0.006   | $F_{(2,34)} = 1.04, p = 0.31$           | $F_{(2,34)} = 0.35, p = 0.56$           | -----                                   |
| <i>5-HT<sub>1A<math>\alpha</math></sub></i> | 0.01 $\pm$ 0.002     | 0.009 $\pm$ 0.001   | 0.01 $\pm$ 0.002     | 0.02 $\pm$ 0.004   | $F_{(2,34)} = 5.78, p = \mathbf{0.02}$  | $F_{(2,34)} = 0.03, p = 0.86$           | -----                                   |
| <i>5-HT<sub>1A<math>\beta</math></sub></i>  | 0.003 $\pm$ 0.0004   | 0.004 $\pm$ 0.0005  | 0.005 $\pm$ 0.001    | 0.008 $\pm$ 0.001  | $F_{(2,22)} = 13.7, p = \mathbf{0.001}$ | $F_{(2,22)} = 4.3, p = 0.05$            | -----                                   |
| <i>5-HTT<sub>A</sub></i>                    | 0.004 $\pm$ 0.001    | 0.003 $\pm$ 0.001   | 0.004 $\pm$ 0.0001   | 0.004 $\pm$ 0.001  | $F_{(2,13)} = 0.62, p = 0.44$           | $F_{(2,13)} = 0.1, p = 0.76$            | -----                                   |
| <i>5-HTT<sub>B</sub></i>                    | -----                | -----               | -----                | -----              | -----                                   | -----                                   | -----                                   |
| <i>crf</i>                                  | 0.03 $\pm$ 0.01      | 0.01 $\pm$ 0.003    | 0.01 $\pm$ 0.002     | 0.02 $\pm$ 0.002   | $F_{(2,30)} = 0.52, p = 0.48$           | $F_{(2,30)} = 3.19, p = 0.08$           | -----                                   |
| <i>crfbp</i>                                | 0.01 $\pm$ 0.001     | 0.009 $\pm$ 0.002   | 0.008 $\pm$ 0.001    | 0.01 $\pm$ 0.002   | $F_{(3,26)} = 0.39, p = 0.54$           | $F_{(3,26)} = 0.05, p = 0.83$           | $F_{(3,26)} = 6.16, p = \mathbf{0.02}$  |
| <i>crf<sub>1</sub></i>                      | 0.006 $\pm$ 0.001    | 0.005 $\pm$ 0.001   | 0.005 $\pm$ 0.001    | 0.006 $\pm$ 0.002  | $F_{(2,37)} = 0.05, p = 0.83$           | $F_{(2,37)} = 0.04, p = 0.83$           | -----                                   |
| <i>crf<sub>2</sub></i>                      | -----                | -----               | -----                | -----              | -----                                   | -----                                   | -----                                   |
| <i>5-HT</i>                                 | 208 $\pm$ 4          | 174 $\pm$ 6         | 163 $\pm$ 8          | 205 $\pm$ 17       | $F_{(2,37)} = 0.01, p = 0.92$           | $F_{(2,37)} = 0.4, p = 0.53$            | -----                                   |
| <i>5-HIAA</i>                               | 22 $\pm$ 4           | 23 $\pm$ 2          | 18 $\pm$ 2           | 33 $\pm$ 4         | $F_{(3,39)} = 0.9, p = 0.35$            | $F_{(3,39)} = 7.2, p = \mathbf{0.01}$   | $F_{(3,39)} = 5.15, p = \mathbf{0.03}$  |
| <i>DA</i>                                   | 76 $\pm$ 24          | 65 $\pm$ 12         | 36 $\pm$ 5           | 49 $\pm$ 10        | $F_{(2,37)} = 1.44, p = 0.24$           | $F_{(2,37)} = 0.16, p = 0.69$           | -----                                   |

|                           |               |                |              |              |                                        |                                         |                                          |
|---------------------------|---------------|----------------|--------------|--------------|----------------------------------------|-----------------------------------------|------------------------------------------|
| <b>DOPAC</b>              | 10 ± 3        | 9 ± 2          | 8 ± 2        | 4 ± 1        | $F_{(2,35)} = 1.69, p = 0.2$           | $F_{(2,35)} = 1.41, p = 0.24$           | -----                                    |
| <b>Vv</b>                 |               |                |              |              |                                        |                                         |                                          |
| <i>pcna</i>               | 0.17 ± 0.07   | 0.06 ± 0.02    | 0.17 ± 0.04  | 0.09 ± 0.02  | $F_{(2,24)} = 0.33, p = 0.57$          | $F_{(2,24)} = 5.45, p = \mathbf{0.03}$  | -----                                    |
| <i>bdnf</i>               | 0.16 ± 0.05   | 0.05 ± 0.01    | 0.07 ± 0.02  | 0.39 ± 0.14  | $F_{(3,23)} = 3.22, p = 0.09$          | $F_{(3,23)} = 1.59, p = 0.22$           | $F_{(3,23)} = 11.69, p = \mathbf{0.002}$ |
| <i>neurod</i>             | 0.26 ± 0.25   | 0.04 ± 0.01    | 0.02 ± 0.005 | 0.03 ± 0.009 | $F_{(2,12)} = 0.43, p = 0.53$          | $F_{(2,12)} = 3.9, p = 0.07$            | -----                                    |
| <i>5-HT<sub>1Aα</sub></i> | 0.02 ± 0.008  | 0.02 ± 0.002   | 0.04 ± 0.01  | 0.03 ± 0.004 | $F_{(2,24)} = 2.75, p = 0.11$          | $F_{(2,24)} = 0.33, p = 0.57$           | -----                                    |
| <i>5-HT<sub>1Aβ</sub></i> | 0.01 ± 0.002  | 0.008 ± 0.0006 | 0.02 ± 0.006 | 0.01 ± 0.005 | $F_{(2,19)} = 4.84, p = \mathbf{0.04}$ | $F_{(2,19)} = 1.32, p = 0.26$           | -----                                    |
| <i>5-HTT<sub>A</sub></i>  | 0.006 ± 0.001 | 0.003 ± 0.0004 | 0.01 ± 0.005 | -----        | -----                                  | -----                                   | -----                                    |
| <i>5-HTT<sub>B</sub></i>  | -----         | -----          | -----        | -----        | -----                                  | -----                                   | -----                                    |
| <i>crf</i>                | -----         | -----          | -----        | -----        | -----                                  | -----                                   | -----                                    |
| <i>crfbp</i>              | -----         | -----          | -----        | -----        | -----                                  | -----                                   | -----                                    |
| <i>crf<sub>1</sub></i>    | -----         | -----          | -----        | -----        | -----                                  | -----                                   | -----                                    |
| <i>crf<sub>2</sub></i>    | -----         | -----          | -----        | -----        | -----                                  | -----                                   | -----                                    |
| <i>5-HT</i>               | -----         | -----          | -----        | -----        | -----                                  | -----                                   | -----                                    |
| <i>5-HIAA</i>             | -----         | -----          | -----        | -----        | -----                                  | -----                                   | -----                                    |
| DA                        | 577 ± 69      | 462 ± 26       | 545 ± 72     | 503 ± 87     | $F_{(2,33)} = 0.01, p = 0.93$          | $F_{(2,33)} = 1.65, p = 0.21$           | -----                                    |
| DOPAC                     | 34 ± 12       | 22 ± 2         | 36 ± 7       | 29 ± 9       | $F_{(2,28)} = 0.01, p = 0.97$          | $F_{(2,28)} = 0.57, p = 0.46$           | -----                                    |
| <b>Plasma</b>             |               |                |              |              |                                        |                                         |                                          |
| Cortisol                  | 5 ± 1         | 150 ± 24       | 6 ± 2        | 96 ± 17      | $F_{(3,108)} = 14, p < \mathbf{0.001}$ | $F_{(3,108)} = 143, p < \mathbf{0.001}$ | $F_{(3,108)} = 9.36, p = \mathbf{0.002}$ |

**Table S3** Mean ( $\pm$  SD) Cq values and efficiencies for target genes in reactive and proactive fish at basal and acute stress conditions in dorsolateral pallium (Dl), dorsomedial pallium (Dm) and ventral part of the central telencephalon (Vv). The total number of individuals per group is depicted as N, while *n* indicates the number of individuals with a Cq  $\leq$  34.5 per target gene.

|                                             | Efficiency       | Control        | Reactive      |                |               | Proactive      |               |                |              |
|---------------------------------------------|------------------|----------------|---------------|----------------|---------------|----------------|---------------|----------------|--------------|
|                                             |                  |                | N = 10        | Stress         | N = 14        | Control        | N = 12        | Stress         | N = 8        |
| <b>Dl</b>                                   |                  |                |               |                |               |                |               |                |              |
| <i>pcna</i>                                 | 1.84 $\pm$ 0.02  | 29.6 $\pm$ 1.8 | <i>n</i> = 6  | 30.5 $\pm$ 1.8 | <i>n</i> = 10 | 30.3 $\pm$ 2.2 | <i>n</i> = 11 | 29.3 $\pm$ 2   | <i>n</i> = 8 |
| <i>bdnf</i>                                 | 1.87 $\pm$ 0.004 | 30 $\pm$ 2     | <i>n</i> = 9  | 28.4 $\pm$ 1.6 | <i>n</i> = 14 | 28.6 $\pm$ 2   | <i>n</i> = 12 | 28.1 $\pm$ 2.3 | <i>n</i> = 8 |
| <i>neurod</i>                               | 1.81 $\pm$ 0.01  | 30.6 $\pm$ 3.1 | <i>n</i> = 3  | 32.3 $\pm$ 2   | <i>n</i> = 11 | 30.4 $\pm$ 3.4 | <i>n</i> = 10 | 31.9 $\pm$ 1.4 | <i>n</i> = 7 |
| <i>5-HT<sub>1A<math>\alpha</math></sub></i> | 1.86 $\pm$ 0.01  | 32.2 $\pm$ 2.4 | <i>n</i> = 6  | 31.3 $\pm$ 1.2 | <i>n</i> = 10 | 31.9 $\pm$ 1   | <i>n</i> = 12 | 31.4 $\pm$ 0.2 | <i>n</i> = 6 |
| <i>5-HT<sub>1A<math>\beta</math></sub></i>  | 1.83 $\pm$ 0.004 | 33.7 $\pm$ 0.6 | <i>n</i> = 3  | 33.2 $\pm$ 0.7 | <i>n</i> = 5  | 32.9 $\pm$ 0.5 | <i>n</i> = 4  | 33.5 $\pm$ 0.7 | <i>n</i> = 4 |
| <i>5-HTTA</i>                               | 1.86 $\pm$ 0.02  | ----           | ----          | 33.2 $\pm$ 0.8 | <i>n</i> = 4  | 33.7 $\pm$ 0.6 | <i>n</i> = 6  | 33.2 $\pm$ 0.6 | <i>n</i> = 2 |
| <i>5-HTTB</i>                               | 1.81 $\pm$ 0.03  | 25.2 $\pm$ 0.4 | <i>n</i> = 2  | ----           | ----          | ----           | ----          | ----           | ----         |
| <i>crf</i>                                  | 1.89 $\pm$ 0.003 | 32.1 $\pm$ 1.8 | <i>n</i> = 7  | 31.9 $\pm$ 1.4 | <i>n</i> = 13 | 31.2 $\pm$ 1.3 | <i>n</i> = 11 | 31 $\pm$ 1.1   | <i>n</i> = 7 |
| <i>crfbp</i>                                | 1.84 $\pm$ 0.004 | 33.2 $\pm$ 1.5 | <i>n</i> = 7  | 31.9 $\pm$ 1.6 | <i>n</i> = 11 | 31.3 $\pm$ 1.5 | <i>n</i> = 12 | 32.5 $\pm$ 2.9 | <i>n</i> = 7 |
| <i>crf<sub>1</sub></i>                      | 1.88 $\pm$ 0.02  | 33.7 $\pm$ 0.9 | <i>n</i> = 4  | 33.2 $\pm$ 0.6 | <i>n</i> = 9  | 32.8 $\pm$ 0.9 | <i>n</i> = 10 | 32.7 $\pm$ 1   | <i>n</i> = 8 |
| <i>crf<sub>2</sub></i>                      | 1.8 $\pm$ 0.006  | ----           | ----          | 33.7 $\pm$ 0.7 | <i>n</i> = 3  | 33.7 $\pm$ 0.5 | <i>n</i> = 3  | 33.6 $\pm$ 0.9 | <i>n</i> = 2 |
| <b>Dm</b>                                   |                  |                |               |                |               |                |               |                |              |
| <i>pcna</i>                                 | 1.85 $\pm$ 0.009 | 28.7 $\pm$ 1.3 | <i>n</i> = 10 | 28.6 $\pm$ 1.3 | <i>n</i> = 14 | 28.9 $\pm$ 1.2 | <i>n</i> = 11 | 29.3 $\pm$ 1.9 | <i>n</i> = 7 |
| <i>bdnf</i>                                 | 1.88 $\pm$ 0.007 | 27.6 $\pm$ 1.4 | <i>n</i> = 10 | 27.1 $\pm$ 1.3 | <i>n</i> = 14 | 27.1 $\pm$ 2   | <i>n</i> = 11 | 27.3 $\pm$ 1.9 | <i>n</i> = 8 |
| <i>neurod</i>                               | 1.82 $\pm$ 0.001 | 32.7 $\pm$ 1.4 | <i>n</i> = 9  | 32.6 $\pm$ 1   | <i>n</i> = 12 | 32.4 $\pm$ 1.6 | <i>n</i> = 10 | 32.9 $\pm$ 1   | <i>n</i> = 7 |
| <i>5-HT<sub>1A<math>\alpha</math></sub></i> | 1.88 $\pm$ 0.009 | 31.4 $\pm$ 0.8 | <i>n</i> = 10 | 31 $\pm$ 0.6   | <i>n</i> = 14 | 31 $\pm$ 1     | <i>n</i> = 11 | 30.8 $\pm$ 0.9 | <i>n</i> = 7 |
| <i>5-HT<sub>1A<math>\beta</math></sub></i>  | 1.84 $\pm$ 0.003 | 33.4 $\pm$ 0.8 | <i>n</i> = 4  | 32.8 $\pm$ 0.8 | <i>n</i> = 10 | 33.4 $\pm$ 0.9 | <i>n</i> = 6  | 32.8 $\pm$ 1.2 | <i>n</i> = 6 |
| <i>5-HTTA</i>                               | 1.87 $\pm$ 0.02  | 33.6 $\pm$ 0.5 | <i>n</i> = 4  | 33.4 $\pm$ 0.7 | <i>n</i> = 5  | 32.7 $\pm$ 0.5 | <i>n</i> = 3  | 33.1 $\pm$ 1   | <i>n</i> = 4 |
| <i>5-HTTB</i>                               | 1.82 $\pm$ 0.04  | ----           | ----          | 28.9 $\pm$ 6.5 | <i>n</i> = 2  | ----           | ----          | ----           | ----         |
| <i>crf</i>                                  | 1.89 $\pm$ 0.003 | 31 $\pm$ 1.4   | <i>n</i> = 9  | 31 $\pm$ 1.5   | <i>n</i> = 13 | 31.1 $\pm$ 1.4 | <i>n</i> = 10 | 30.5 $\pm$ 1.1 | <i>n</i> = 6 |
| <i>crfbp</i>                                | 1.83 $\pm$ 0.008 | 32.7 $\pm$ 0.9 | <i>n</i> = 7  | 33.1 $\pm$ 0.9 | <i>n</i> = 12 | 32.7 $\pm$ 1.2 | <i>n</i> = 8  | 32.7 $\pm$ 0.8 | <i>n</i> = 6 |
| <i>crf<sub>1</sub></i>                      | 1.89 $\pm$ 0.01  | 32.5 $\pm$ 0.7 | <i>n</i> = 10 | 32.6 $\pm$ 0.7 | <i>n</i> = 14 | 32.4 $\pm$ 0.8 | <i>n</i> = 10 | 32.7 $\pm$ 0.6 | <i>n</i> = 7 |
| <i>crf<sub>2</sub></i>                      | 1.77 $\pm$ 0.004 | ----           | ----          | ----           | ----          | ----           | ----          | ----           | ----         |
| <b>Vv</b>                                   |                  |                |               |                |               |                |               |                |              |
| <i>pcna</i>                                 | 1.84 $\pm$ 0.02  | 29.4 $\pm$ 2.3 | <i>n</i> = 6  | 30 $\pm$ 2.4   | <i>n</i> = 10 | 30.1 $\pm$ 1.5 | <i>n</i> = 9  | 30.8 $\pm$ 2.6 | <i>n</i> = 6 |
| <i>bdnf</i>                                 | 1.87 $\pm$ 0.01  | 29.4 $\pm$ 3.1 | <i>n</i> = 7  | 30.3 $\pm$ 2.2 | <i>n</i> = 12 | 29.2 $\pm$ 2.2 | <i>n</i> = 8  | 30.3 $\pm$ 2.4 | <i>n</i> = 7 |
| <i>neurod</i>                               | 1.83 $\pm$ 0.02  | 33.2 $\pm$ 0.7 | <i>n</i> = 6  | 32.1 $\pm$ 1.3 | <i>n</i> = 7  | 32.7 $\pm$ 1.3 | <i>n</i> = 8  | 33.8 $\pm$ 0.4 | <i>n</i> = 6 |
| <i>5-HT<sub>1A<math>\alpha</math></sub></i> | 1.86 $\pm$ 0.02  | 32.2 $\pm$ 1.8 | <i>n</i> = 6  | 31.8 $\pm$ 1.7 | <i>n</i> = 10 | 31.3 $\pm$ 1.9 | <i>n</i> = 8  | 32.1 $\pm$ 2   | <i>n</i> = 5 |
| <i>5-HT<sub>1A<math>\beta</math></sub></i>  | 1.83 $\pm$ 0.03  | 33.2 $\pm$ 0.8 | <i>n</i> = 7  | 32.9 $\pm$ 1.3 | <i>n</i> = 8  | 33 $\pm$ 1     | <i>n</i> = 7  | 33.2 $\pm$ 1.1 | <i>n</i> = 3 |
| <i>5-HTTA</i>                               | 1.86 $\pm$ 0.03  | 33.2 $\pm$ 0.6 | <i>n</i> = 2  | 33.9 $\pm$ 0.7 | <i>n</i> = 2  | 33.9 $\pm$ 0.5 | <i>n</i> = 3  | ----           | ----         |
| <i>5-HTTB</i>                               | 1.84 $\pm$ 0.01  | ----           | ----          | ----           | ----          | ----           | ----          | ----           | ----         |
| <i>crf</i>                                  | 1.84 $\pm$ 0.01  | 32.5 $\pm$ 0.5 | <i>n</i> = 3  | 33 $\pm$ 0.5   | <i>n</i> = 7  | 32.7 $\pm$ 0.6 | <i>n</i> = 5  | 32.9 $\pm$ 0.4 | <i>n</i> = 2 |

|              |             |            |              |             |              |            |              |            |              |
|--------------|-------------|------------|--------------|-------------|--------------|------------|--------------|------------|--------------|
| <i>crfbp</i> | 1.85 ± 0.02 | 32.9 ± 0.9 | <i>n</i> = 3 | 33.3 ± 0.3  | <i>n</i> = 4 | 31.8 ± 0.5 | <i>n</i> = 4 | ----       | ----         |
| <i>crf1</i>  | 1.87 ± 0.02 | 33 ± 0.5   | <i>n</i> = 3 | 33 ± 0.3    | <i>n</i> = 5 | 33.6 ± 0.2 | <i>n</i> = 4 | 32.9 ± 0.2 | <i>n</i> = 2 |
| <i>crf2</i>  | 1.79 ± 0.01 | ----       | ----         | 34.3 ± 0.04 | <i>n</i> = 2 | 34.4 ± 0.1 | <i>n</i> = 2 | ----       | ----         |

**Table S4** All monoamine neurochemistry and gene expression data used for the statistical analysis

[Click here to Download Table S4](#)
